# Supplementary material for: Expansion of the response range of photoelectrochemical UV detector using an ITO/Ag-nanowire/quartz UV-visible transparent conductive electrode
Source: Royal Society of Chemistry journal article supplement (doi:10.1039/d1tc05815k), 2022-01-01
Supplement: d1tc05815k1.pdf [file d1tc05815k1.pdf]

## Expansion of the response range of photoelectrochemical UV detector using an ITO/Ag-nanowire/quartz UV-visible transparent conductive electrode

Youqing Wang,<sup>\*a</sup> Baoping Li,<sup>a</sup> Peiling Ren,<sup>a</sup> Menghan Liu,<sup>a</sup> Zilin Gong,<sup>a</sup> Miaomiao Zhang,<sup>a</sup> Hao Zhao,<sup>b</sup> Yu Zhang,<sup>a</sup> Yanqing Zhang<sup>a</sup> and Jianke Liu<sup>\*a</sup>

<sup>a</sup> Research Center for Semiconductor Materials and Devices, Shaanxi University of Science and Technology, Xi'an 710021, China

<sup>b</sup> School of Science & Technology for Opto-electronic Information, Yantai University, Yantai 264005, China.

\* Corresponding authors. E-mail address: [wangyouqing@sust.edu.cn](mailto:wangyouqing@sust.edu.cn) and [liujk@sust.edu.cn](mailto:liujk@sust.edu.cn)

### Supplementary Information

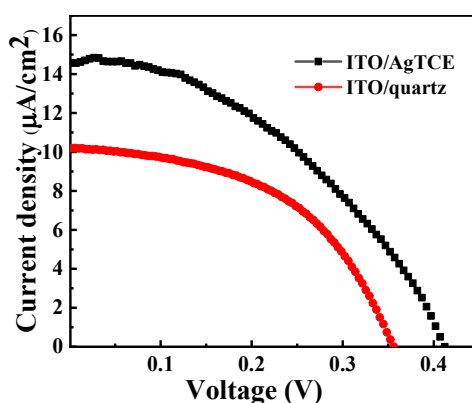

**Fig. S1** Comparison of the photovoltaic performance of ITO/Ag-nanowire and ITO/quartz under UV light at 365 nm.

**Table S1.** The thickness of ITO film corresponding to different sputtering time

| Sputtering time (s) | 30   | 60 | 90   | 120 | 150  | 180 |
|---------------------|------|----|------|-----|------|-----|
| Thickness (nm)      | 14.5 | 29 | 43.5 | 58  | 72.5 | 87  |

**Table S2.** Comparison of the square resistance of six samples before and after sputtering ITO

| TCE                             | 1    | 2    | 3    | 4    | 5    | 6    |
|---------------------------------|------|------|------|------|------|------|
| AgTCEs ( $\Omega/\text{sq}$ )   | 2.64 | 3.07 | 2.43 | 2.68 | 3.54 | 2.58 |
| AgTCE-Is ( $\Omega/\text{sq}$ ) | 2.71 | 3.54 | 2.93 | 2.73 | 3.86 | 2.61 |

**Table S3.** Performance comparison under 365 nm UV light irradiation

| Device   | $J_{\text{sc}}$ ( $\mu\text{A}/\text{cm}^2$ ) | $V_{\text{oc}}$ (V) | FF    | $\eta$ (%) |
|----------|-----------------------------------------------|---------------------|-------|------------|
| AgTCE-I1 | 3.26                                          | 0.336               | 0.42  | 0.04       |
| AgTCE-I2 | 8.14                                          | 0.371               | 0.363 | 0.09       |
| AgTCE-I3 | 14.6                                          | 0.412               | 0.419 | 0.21       |
| AgTCE-I4 | 13.8                                          | 0.4                 | 0.405 | 0.19       |
| AgTCE-I5 | 7.50                                          | 0.31                | 0.450 | 0.08       |
| AgTCE-I6 | 6.82                                          | 0.273               | 0.384 | 0.06       |

**Table S4.** Performance comparison under 254 nm UV light irradiation

| Device   | $J_{\text{sc}}$ ( $\mu\text{A}/\text{cm}^2$ ) | $V_{\text{oc}}$ (V) | FF    | $\eta$ (%) |
|----------|-----------------------------------------------|---------------------|-------|------------|
| AgTCE-I1 | 3.74                                          | 0.347               | 0.444 | 0.05       |
| AgTCE-I2 | 5.50                                          | 0.274               | 0.383 | 0.048      |
| AgTCE-I3 | 9.80                                          | 0.338               | 0.449 | 0.12       |
| AgTCE-I4 | 5.80                                          | 0.242               | 0.378 | 0.044      |
| AgTCE-I5 | 3.78                                          | 0.219               | 0.362 | 0.025      |
| AgTCE-I6 | 2.92                                          | 0.192               | 0.361 | 0.017      |

**Table S5.** Performance comparison under 365 nm UV light irradiation

| Device   | $J_{sc}$ ( $\mu\text{A}/\text{cm}^2$ ) | $V_{oc}$ (V) | FF    | $\eta$ (%) |
|----------|----------------------------------------|--------------|-------|------------|
| AgTCE-L1 | 11.2                                   | 0.431        | 0.514 | 0.2        |
| AgTCE-L2 | 15.6                                   | 0.406        | 0.443 | 0.24       |
| AgTCE-L3 | 11.6                                   | 0.444        | 0.528 | 0.22       |
| AgTCE-L4 | 10.7                                   | 0.321        | 0.481 | 0.14       |
| AgTCE-L5 | 8.64                                   | 0.321        | 0.403 | 0.1        |

**Table S6.** Performance comparison under 254 nm UV light irradiation

| Device   | $J_{sc}$ ( $\mu\text{A}/\text{cm}^2$ ) | $V_{oc}$ (V) | FF    | $\eta$ (%) |
|----------|----------------------------------------|--------------|-------|------------|
| AgTCE-L1 | 8.1                                    | 0.304        | 0.413 | 0.084      |
| AgTCE-L2 | 13.2                                   | 0.278        | 0.366 | 0.112      |
| AgTCE-L3 | 7.14                                   | 0.306        | 0.44  | 0.08       |
| AgTCE-L4 | 7.76                                   | 0.263        | 0.437 | 0.074      |
| AgTCE-L5 | 7.48                                   | 0.287        | 0.397 | 0.07       |
